# Supplementary material
Source: PubMed Central journal article supplement (PMC10682957)

**Supplementary Figure 1: Response to fifth-line cytotoxic treatment (n=11 patients)**

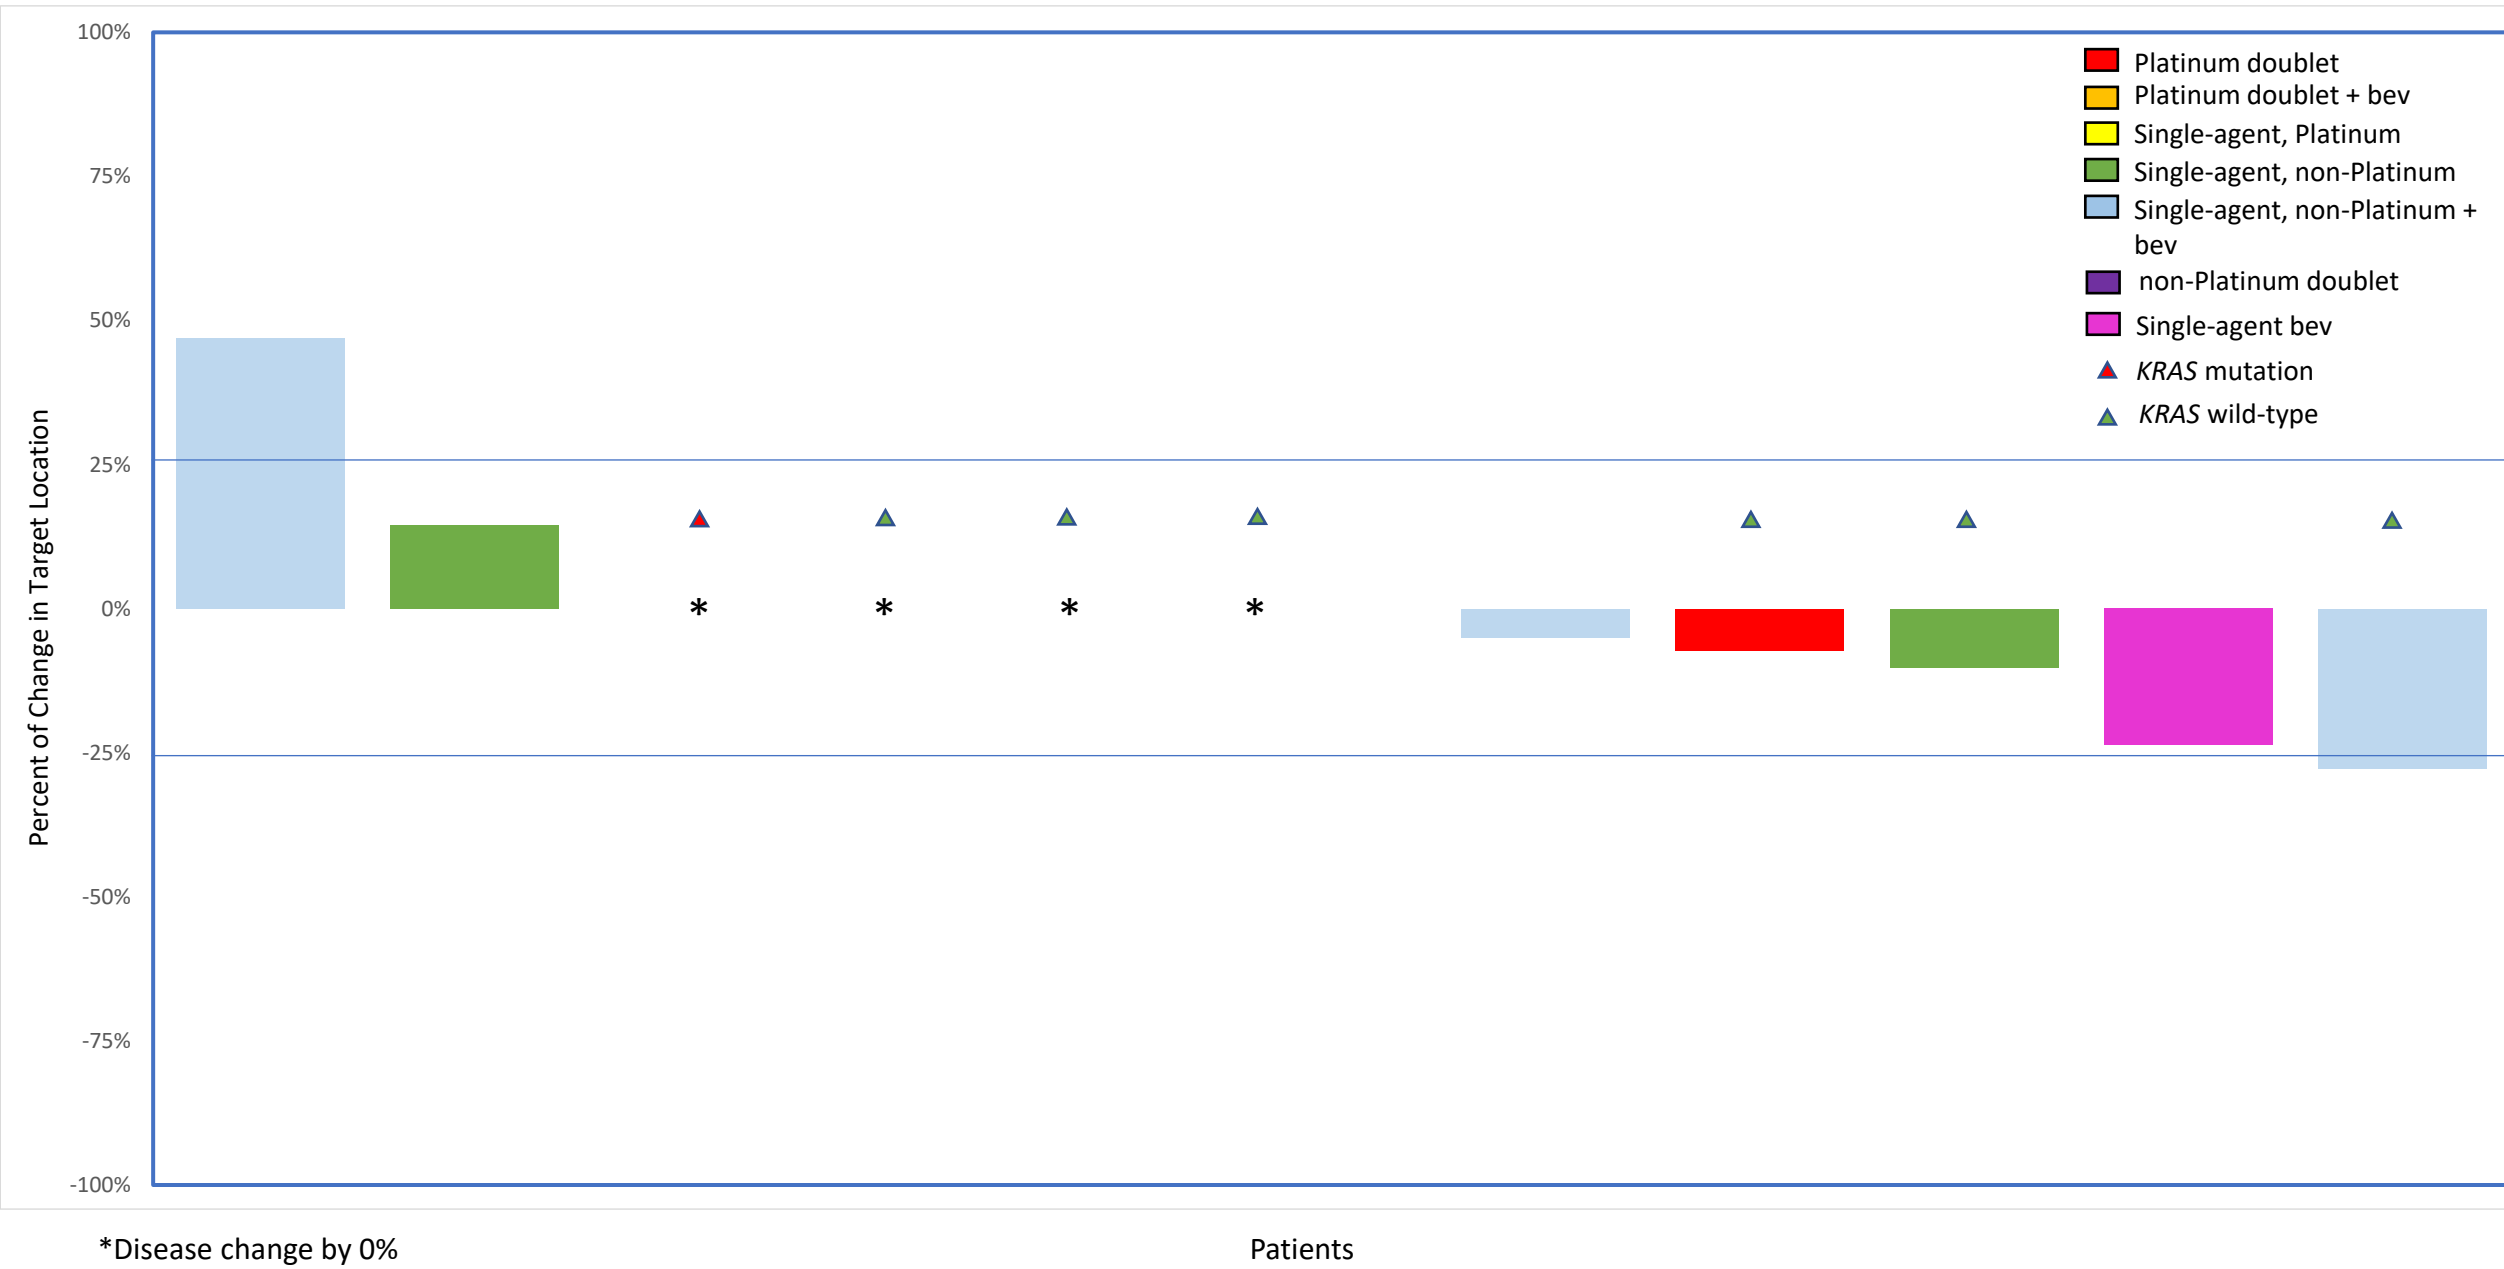

Supplement: NIHMS1939031-supplement-Supinfo.pdf [file NIHMS1939031-supplement-Supinfo.pdf]
